# Supplementary material for: Response of Arabidopsis primary metabolism and circadian clock to low night temperature in a natural light environment
Source: PubMed Central journal article supplement (PMC6137998; doi:10.1093/jxb/ery276), 2018-07-25
Supplement: ery276_suppl_supplementary_table_s1.pdf [file ery276_suppl_supplementary_table_s1.pdf]

**Supplemental Table S1. Climate data for the growth cycle in L<sup>VAR-T</sup> and L<sup>VAR-T</sup><sup>VAR</sup> conditions.**

Temperature measurements in °C: Min T=minimum temperature; Max T=maximum temperature; T range=temperature range; Heat sum=thermal sum calculated from 10. March onwards as the cumulative sum of (min T + max T)/2.

DLI=Daily Light Integral (mol m<sup>-2</sup> d<sup>-1</sup>).

| Growth condition                  | Date      | Min T (°C) | Max T (°C) | T range (°C) | Heat Sum (°C) | DLI (mol m <sup>-2</sup> d <sup>-1</sup> ) |
|-----------------------------------|-----------|------------|------------|--------------|---------------|--------------------------------------------|
| L <sup>VAR-T</sup> <sup>VAR</sup> | 10MAR2015 | 12.0       | 20.0       | 8.0          | 16.0          | 8                                          |
| L <sup>VAR-T</sup> <sup>VAR</sup> | 11MAR2015 | 11.0       | 19.0       | 8.0          | 31.0          | 6                                          |
| L <sup>VAR-T</sup> <sup>VAR</sup> | 12MAR2015 | 11.0       | 16.0       | 5.0          | 44.5          | 3.8                                        |
| L <sup>VAR-T</sup> <sup>VAR</sup> | 13MAR2015 | 11.0       | 19.0       | 7.0          | 59.5          | 8.9                                        |
| L <sup>VAR-T</sup> <sup>VAR</sup> | 14MAR2015 | 11.0       | 17.0       | 6.0          | 73.5          | 4.9                                        |
| L <sup>VAR-T</sup> <sup>VAR</sup> | 15MAR2015 | 11.0       | 18.0       | 7.0          | 88.0          | 4.6                                        |
| L <sup>VAR-T</sup> <sup>VAR</sup> | 16MAR2015 | 12.0       | 27.0       | 15.0         | 107.5         | 15.9                                       |
| L <sup>VAR-T</sup> <sup>VAR</sup> | 17MAR2015 | 11.0       | 30.0       | 19.0         | 128.0         | 16.7                                       |
| L <sup>VAR-T</sup> <sup>VAR</sup> | 18MAR2015 | 13.0       | 24.0       | 11.0         | 146.5         | 19.9                                       |
| L <sup>VAR-T</sup> <sup>VAR</sup> | 19MAR2015 | 12.0       | 24.0       | 12.0         | 164.5         | 19.6                                       |
| L <sup>VAR-T</sup> <sup>VAR</sup> | 20MAR2015 | 12.0       | 22.0       | 10.0         | 181.5         | 17.2                                       |
| L <sup>VAR-T</sup> <sup>VAR</sup> | 21MAR2015 | 12.0       | 16.0       | 4.0          | 195.5         | 5.6                                        |
| L <sup>VAR-T</sup> <sup>VAR</sup> | 22MAR2015 | 10.0       | 25.0       | 15.0         | 213.0         | 21.4                                       |
| L <sup>VAR-T</sup> <sup>VAR</sup> | 23MAR2015 | 10.0       | 30.0       | 20.0         | 233.0         | 20.9                                       |
| L <sup>VAR-T</sup> <sup>VAR</sup> | 24MAR2015 | 12.0       | 27.0       | 15.0         | 252.5         | 14.2                                       |

| Growth condition   | Date      | Min T (°C) | Max T (°C) | T range (°C) | Heat Sum (°C) | DLI (mol m <sup>-2</sup> d <sup>-1</sup> ) |
|--------------------|-----------|------------|------------|--------------|---------------|--------------------------------------------|
| L <sup>VAR-T</sup> | 10MAR2015 | 19.8       | 23.2       | 3.4          | 21.5          | 7.6                                        |
| L <sup>VAR-T</sup> | 11MAR2015 | 19.7       | 23.4       | 3.7          | 43.0          | 5.3                                        |
| L <sup>VAR-T</sup> | 12MAR2015 | 19.7       | 23.0       | 3.3          | 64.0          | 3.5                                        |
| L <sup>VAR-T</sup> | 13MAR2015 | 19.8       | 23.3       | 3.5          | 86.0          | 7.5                                        |
| L <sup>VAR-T</sup> | 14MAR2015 | 19.8       | 22.9       | 3.1          | 107.0         | 4.4                                        |
| L <sup>VAR-T</sup> | 15MAR2015 | 19.7       | 22.9       | 3.2          | 128.5         | 3.9                                        |
| L <sup>VAR-T</sup> | 16MAR2015 | 19.7       | 23.7       | 4.0          | 150.0         | 12.6                                       |
| L <sup>VAR-T</sup> | 17MAR2015 | 19.8       | 23.6       | 3.8          | 172.0         | 12.5                                       |
| L <sup>VAR-T</sup> | 18MAR2015 | 19.8       | 23.9       | 4.1          | 194.0         | 10.7                                       |
| L <sup>VAR-T</sup> | 19MAR2015 | 19.7       | 23.9       | 4.2          | 216.0         | 11.3                                       |
| L <sup>VAR-T</sup> | 20MAR2015 | 19.7       | 23.9       | 4.2          | 237.0         | 8.8                                        |
| L <sup>VAR-T</sup> | 21MAR2015 | 19.8       | 23.3       | 3.5          | 259.0         | 5                                          |
| L <sup>VAR-T</sup> | 22MAR2015 | 19.7       | 23.9       | 4.2          | 281.0         | 12                                         |
| L <sup>VAR-T</sup> | 23MAR2015 | 19.8       | 23.9       | 4.1          | 303.0         | 11.6                                       |
| L <sup>VAR-T</sup> | 24MAR2015 | 19.8       | 23.3       | 3.5          | 324.0         | 11.7                                       |
